# Supplementary material for: Association of adipokines with severity of knee osteoarthritis assessed clinically and on magnetic resonance imaging
Source: PubMed Central journal article supplement — Osteoarthr Cartil Open. 2023 Aug 12;5(4):100405. doi: 10.1016/j.ocarto.2023.100405 (PMC10469549; doi:10.1016/j.ocarto.2023.100405), 2023-08-12
Supplement: mmc1.pdf [file mmc1.pdf]

**Supplementary tables for:**

**Chong, et al. Association of adipokines with severity of knee osteoarthritis assessed clinically and on magnetic resonance imaging**

*Supplementary Table I: Assay information for Adipokines*

|                 | Adipokine Function              | Total samples available for measurement (%) | Mean intra assay CV (%) | Mean Inter assay CV (%) | Samples with un-detectable concentrations (%) | LLOD (pg/mL) | Manufacturer   |
|-----------------|---------------------------------|---------------------------------------------|-------------------------|-------------------------|-----------------------------------------------|--------------|----------------|
| (s) Leptin      | Appetite regulation             | 139 (100)                                   | 16                      | 23                      | 0                                             | 19.0         | Merck Group    |
| (s) Adiponectin | Glucose level regulation        | 139 (100)                                   | 2                       | 10                      | 0                                             | 6.0          | Merck Group    |
| (s) Resistin    | Regulation of production of LDL | 139 (100)                                   | 2                       | 8                       | 0                                             | 2.6          | Merck Group    |
| (s) hs-CRP      | Marker of systemic inflammation | 139 (100)                                   | 8.3                     | 8.3                     | 0                                             | 0.1          | MP Biomedicals |

*CV, coefficient of variations; hs-CRP, high sensitivity C-Reactive protein; LDL, Low-Density Lipoprotein; LLOD, Lower Limit of Detection; pg/mL, picograms per milliliter; (s), serum; %, percentage.*

*Supplementary Table II. Spearman's correlations between biomarkers.*

|                | Spearman's Rho |             |                |           |
|----------------|----------------|-------------|----------------|-----------|
|                | (s)Leptin      | (s)Resistin | (s)Adiponectin | (s)hs-CRP |
| (s)Leptin      | 1.00           | 0.16        | -0.14          | 0.33**    |
| (s)Resistin    | 0.16           | 1.000       | 0.12           | 0.12      |
| (s)Adiponectin | -0.14          | 0.122       | 1.00           | 0.02      |
| (s)hs-CRP      | 0.33**         | 0.12        | 0.02           | 1.00      |

*\*p<0.05, \*\*p<0.01, hs-CRP, high sensitivity C-Reactive protein; (s), serum.*

Supplementary Table III. Association of adipokines and hs-CRP with MRI and other features, Univariable analysis. (Participants with KL $\geq$ 2, n=53)

| Dependent Variable         | $\beta$ (95% confidence intervals)    |                                   |                                  |                                       |
|----------------------------|---------------------------------------|-----------------------------------|----------------------------------|---------------------------------------|
|                            | (s) Leptin                            | (s) Adiponectin                   | (s) Resistin                     | (s) hs-CRP                            |
| OST Size                   | <b>1.20 (0.02, 2.37),<br/>p=0.046</b> | -1.16 (-4.10, 1.78),<br>p=0.440   | 0.96 (-1.93, 3.85),<br>p=0.514   | <b>2.48 (0.80, 4.16),<br/>p=0.004</b> |
| % Cart Full Thickness Loss | 0.29 (-0.16, 2.62),<br>p=0.206        | -0.18 (-1.30, 0.94),<br>p=0.759   | -0.26 (-1.36, 0.84),<br>p=0.641  | 0.01 (-0.67, 0.70),<br>p=0.967        |
| BML Size                   | 0.46 (-0.01, 0.94),<br>p=0.057        | -0.45 (-1.64, 0.74),<br>p=0.460   | -0.18 (-1.35, 0.99),<br>p=0.768  | -0.07 (-0.80, 0.66),<br>p=0.850       |
| Infrapatellar synovitis    | 0.18 (-0.14, 0.50),<br>p=0.281        | -0.13 (-0.91, 0.66),<br>p=0.756   | -0.30 (-1.07, 0.47),<br>p=0.442  | -0.29 (-0.19, 0.76),<br>p=0.236       |
| Effusion size              | 0.11 (-0.17, 0.38),<br>p=0.444        | 0.05 (-0.62, 0.72),<br>p=0.877    | 0.07 (-0.59, 0.72),<br>p=0.841   | 0.07 (-0.34, 0.48),<br>p=0.730        |
| Meniscus Extrusion         | 0.26 (-0.01, 0.53),<br>p=0.057        | -0.70 (-0.74, 0.60),<br>p=0.837   | 0.27 (-0.39, 0.92),<br>p=0.424   | <b>0.58 (0.20, 0.96),<br/>p=0.003</b> |
| KL Sum Score               | -0.03 (-0.38, 0.33),<br>p=0.885       | 0.35 (-0.49, 1.20),<br>p=0.412    | -0.28 (-1.09, 0.53),<br>p=0.498  | -0.12 (-0.63, 0.40),<br>p=0.664       |
| WOMAC Pain                 | 3.39 (-2.56, 9.35),<br>p=0.264        | -3.03 (-17.64, 11.58),<br>p=0.684 | -6.09 (-19.90, 7.76),<br>p=0.390 | -2.15 (-11.03, 6.73),<br>p=0.635      |
| WOMAC Function             | 5.96 (-0.25, 12.17),<br>p=0.060       | 4.85 (-10.67, 20.36),<br>P=0.540  | 0.70 (-14.11, 15.51),<br>p=0.927 | 5.22 (-4.14, 14.58),<br>p=0.274       |

*Bold, statistically significant.*

*BML, Bone Marrow Lesion; Cart, Cartilage; hs-CRP, high sensitivity C-Reactive protein KL Sum Score, KL, Kellgren and Lawrence grading; MRI, Magnetic Resonance Imaging; OST, Osteophyte; (s), serum; WOMAC, Western Ontario and McMaster Universities Osteoarthritis Index.*
